# Supplementary material
Source: publisher figshare collection journal article supplement (https://tandf.figshare.com/articles/dataset/_/4740331)
Supplement: Supplementary file 1 [file 2]

## Supplementary material

### Proof of Property 2.1

Following Domowitz and White (1982), we made assumptions as follows:

Assumption 1. Sequence  $g(y_i, \boldsymbol{\vartheta})$ ,  $i = 1, \dots, N$  are continuous functions of  $\boldsymbol{\vartheta}$  for  $\forall y_i \in \Omega$  and measurable functions of  $y_i$  for each  $\boldsymbol{\vartheta} \in \Theta$ , where  $\Theta$  is a compact subset of a finite-dimensional Euclidean space.

Assumption 2. The random vectors  $\{Y_i\}$  are either  $\phi$ -mixing, with  $\phi(m)$  of size  $r_1/(2r_1 - 1)$ ,  $r_1 \geq 1$ ; or  $\alpha$ -mixing, with  $\alpha(m)$  of size  $r_1/(r_1 - 1)$ ,  $r_1 > 1$  (Domowitz and White, 1982).

Assumption 3. Sequence  $g(y_i, \boldsymbol{\vartheta})$  is dominated by uniformly  $(r_1 + \varrho)$ -integrable functions,  $r_1 \geq 1$ ,  $0 < \varrho \leq r_1$ .

Assumption 4.  $\bar{G}_N(\boldsymbol{\vartheta})$  has a unique maximum  $\boldsymbol{\vartheta}_0$ .

Assumption 5.  $g(y_i, \boldsymbol{\vartheta})$  is continuously differentiable of order 2 for  $\boldsymbol{\vartheta}$ .

Assumption 6.  $\{g'_j(y_i, \boldsymbol{\vartheta})^2\}$  are dominated by uniformly  $r_2$ -integrable functions, where  $r_2 > 1$ ,  $g'_j(y_i, \boldsymbol{\vartheta}) = \partial g(y_i, \boldsymbol{\vartheta}) / \partial \vartheta_j$ .

Assumption 7. Define  $\mathbf{Q}_{a,N} = \text{var}[N^{-1/2} \sum_{i=a+1}^{a+N} g'(y_i, \boldsymbol{\vartheta}_0)]$ . Assume there exists a positive definite matrix  $\mathbf{Q}$  such that  $\lambda^T \mathbf{Q}_{a,N} \lambda - \lambda^T \mathbf{Q} \lambda \rightarrow 0$  as  $N \rightarrow \infty$  for any real non-zero vector  $\lambda$ .

Assumption 8.  $\{g''_{jk}(y_i, \boldsymbol{\vartheta})\}$  are dominated by uniformly  $r_1 + \varrho$ -integrable functions, where  $0 < \varrho \leq r_1$ ,  $g''_{jk}(y_i, \boldsymbol{\vartheta}) = \partial^2 g(y_i, \boldsymbol{\vartheta}) / \partial \vartheta_j \partial \vartheta_k$ .

Assumption 9. For all  $N$  sufficiently large, the matrix  $\bar{G}_N''(\boldsymbol{\vartheta}) = 1/N \sum_{i=1}^N E[g''(y_i, \boldsymbol{\vartheta})]$  has constant rank in some open  $\epsilon$ -neighborhood of  $\boldsymbol{\vartheta}_0$ .

We can strengthen slightly the memory requirements of Assumption 2 to allow the application of Theorem 2.6 of Domowitz and White (1982).

Assumption 2'. Assumption 2 holds, and either  $\phi(m)$  is of size  $r_2/(r_2 - 1)$  or  $\alpha(m)$  is of size  $\max[r_1/(r_1 - 1), r_2/(r_2 - 1)]$ ,  $r_1, r_2 > 1$ .

Under Assumptions 1 – 4,  $g(y_i, \boldsymbol{\vartheta})$  satisfies conditions of Theorem 2.5 of Domowitz and White (1982), then, we have

$$\left| N^{-1} \sum_{i=1}^N [g(y_i, \boldsymbol{\vartheta}) - E(g(y_i, \boldsymbol{\vartheta}))] \right| \rightarrow 0, a.s.$$

Furthermore, apply Theorem 2.2 of Domowitz and White (1982), Property 2.1(a) can be proved.

Under assumptions 2', 5, 8 and 9,  $g''_{jk}(y_i, \boldsymbol{\vartheta})$  satisfies conditions of Theorem 2.5 of Domowitz and White (1982), therefore,

$$\left| N^{-1} \sum_{i=1}^N [g''_{jk}(y_i, \boldsymbol{\vartheta}) - E(g''_{jk}(y_i, \boldsymbol{\vartheta}))] \right| \rightarrow 0, a.s.$$

Thus,  $|G_N''(\mathbf{y}, \boldsymbol{\vartheta}) - \bar{G}_N''(\boldsymbol{\vartheta})| \rightarrow 0, a.s.$  From  $\hat{\boldsymbol{\vartheta}}_N \rightarrow \boldsymbol{\vartheta}_0$  *a.s.*, by the result in Theorem 2.3 in Domowitz and White (1982), we have  $|G_N''(\mathbf{y}, \tilde{\boldsymbol{\vartheta}}) - \bar{G}_N''(\boldsymbol{\vartheta}_0)| \rightarrow 0, a.s.$ , where  $\tilde{\boldsymbol{\vartheta}}$  is between  $\hat{\boldsymbol{\vartheta}}_N$  and  $\boldsymbol{\vartheta}_0$ . Under assumptions 2', 5, 6 and 7, according to Theorem 2.6 in Domowitz and White (1982), we get  $\sqrt{N}G_N'(\mathbf{y}, \boldsymbol{\vartheta}_0) \xrightarrow{L} N(\mathbf{0}, \mathbf{Q}_N)$ , where  $\mathbf{Q}_N = \mathbf{Q}_{0,N} = var(\sqrt{N}G_N'(\mathbf{y}, \boldsymbol{\vartheta}_0))$ . Applying mean-value argument analogous (2.6) Property 2.1(b) is proved.
